# Supplementary figures and images for: Genetic population structure of sympatric and allopatric populations of Baltic ciscoes (Coregonus albula complex, Teleostei, Coregonidae)
Source: Springer Nature journal article supplement (doi:10.1186/1471-2148-10-85), 2010-01-01

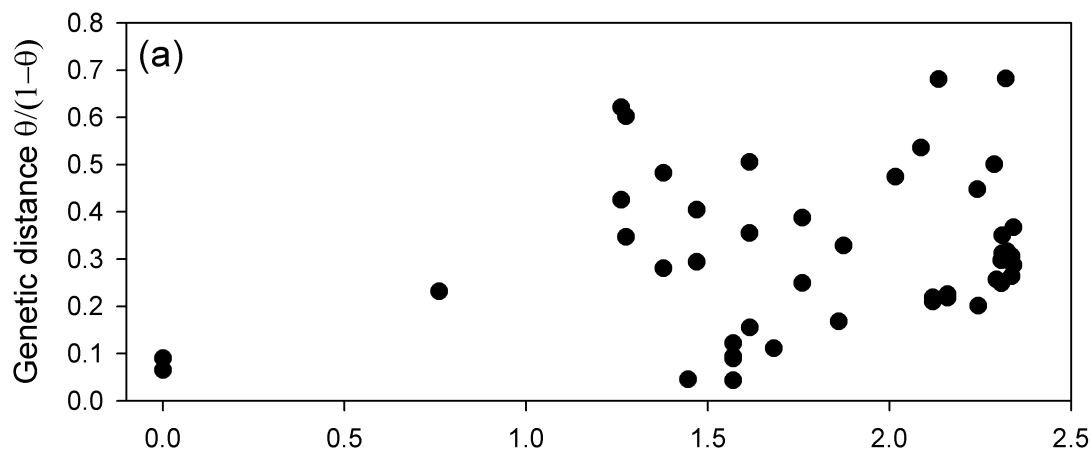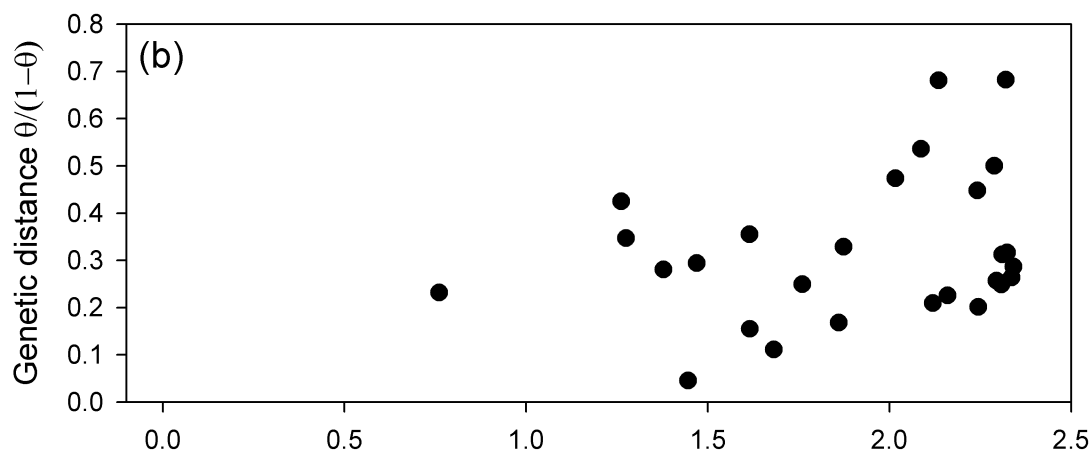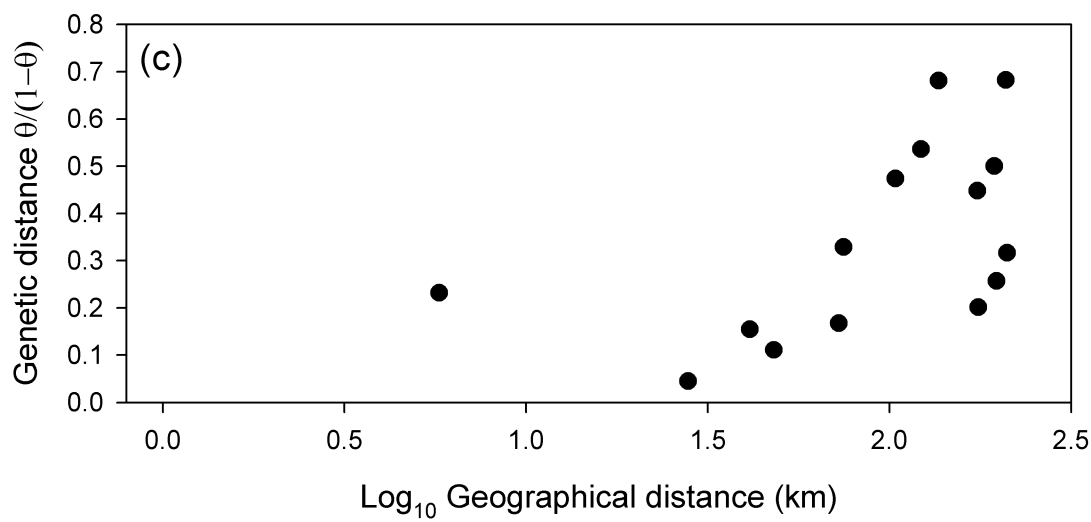

Supplement: Additional file 2 [file 1471-2148-10-85-s2.pdf]
